# Supplementary material for: Catalytic formation of oxalic acid on the partially oxidised greigite Fe3S4(001) surface
Source: Royal Society of Chemistry journal article supplement (doi:10.1039/d2cp00333c), 2022-01-01
Supplement: d2cp00333c1.pdf [file d2cp00333c1.pdf]

Supporting Information for:

## **Catalytic formation of oxalic acid on the partially oxidised greigite Fe<sub>3</sub>S<sub>4</sub>(001) surface**

David Santos-Carballal,<sup>1,\*</sup> and Nora H de Leeuw<sup>1,2</sup>

<sup>1</sup> *School of Chemistry, University of Leeds, Leeds LS2 9JT, United Kingdom*

<sup>2</sup> *Department of Earth Sciences, Utrecht University, Princetonplein 8A, 3584 CD Utrecht, The Netherlands*

*Email: [D.Santos-Carballal@leeds.ac.uk](mailto:D.Santos-Carballal@leeds.ac.uk)*

### **Table of contents**

- Linear response functions for the change in the number of *d* electrons on one Fe site of Fe<sub>3</sub>S<sub>4</sub> as a function of a spherical potential.
- Bird's eye view of the non-planar potential energy surface representations of the surface free energies for all the coverages of O considered for termination Fe<sub>A</sub> of the Fe<sub>3</sub>S<sub>4</sub>(001) surface.
- Unscaled and scaled wavenumbers for the fundamental vibrational modes calculated for a single CO<sub>2</sub> and H<sub>2</sub>O molecules interacting with the partially oxidised 62.5O-Fe<sub>3</sub>S<sub>4</sub>(001) surface.
- Vibrational entropies calculated for the adsorbed species observed in the three modelled pathways at various temperatures.
- Entropy extracted from the thermodynamic tables for the isolated CO<sub>2</sub>, H<sub>2</sub>O, H<sub>2</sub>C<sub>2</sub>O<sub>4</sub> and O<sub>2</sub> molecules.
- Minimum energy pathways (MEPs) for the conversion of CO<sub>2</sub> and H<sub>2</sub>O into H<sub>2</sub>C<sub>2</sub>O<sub>4</sub> on the partially oxidised 62.5O-Fe<sub>3</sub>S<sub>4</sub>(001) surface at various temperatures.

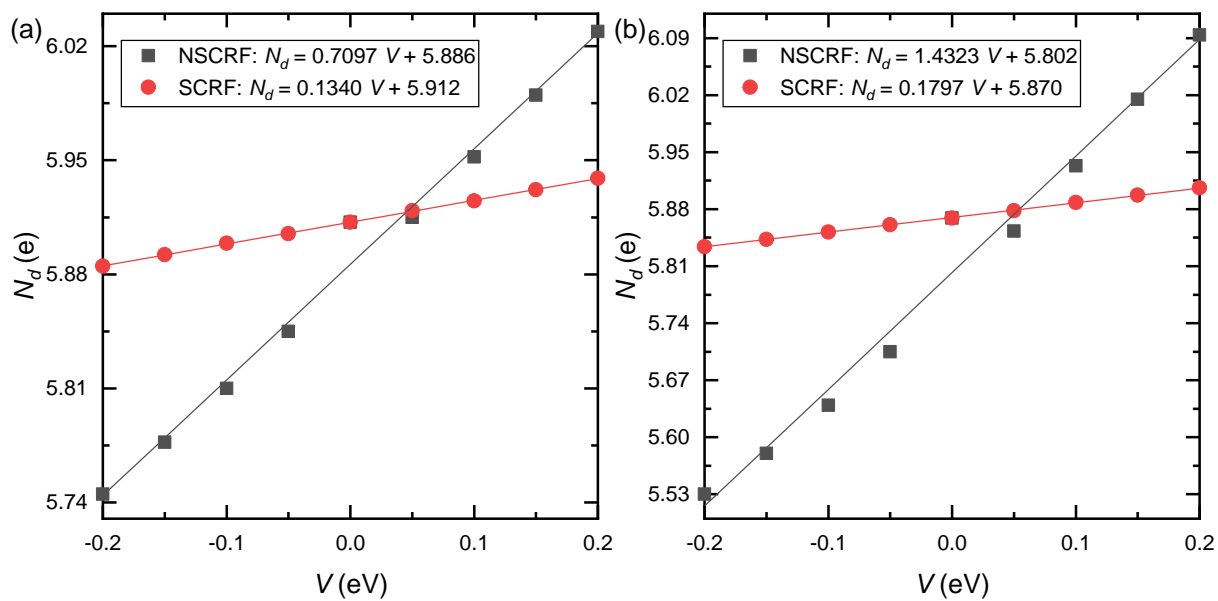

**Figure S11.** Linear non-self-consistent (NSCF) and self-consistent response functions (SCF) for the change in the number of  $d$  electrons on one atomic (a)  $\text{Fe}_A$  and (b)  $\text{Fe}_B$  site of  $\text{Fe}_3\text{S}_4$  as a function of an additional spherical potential ( $V$ ).

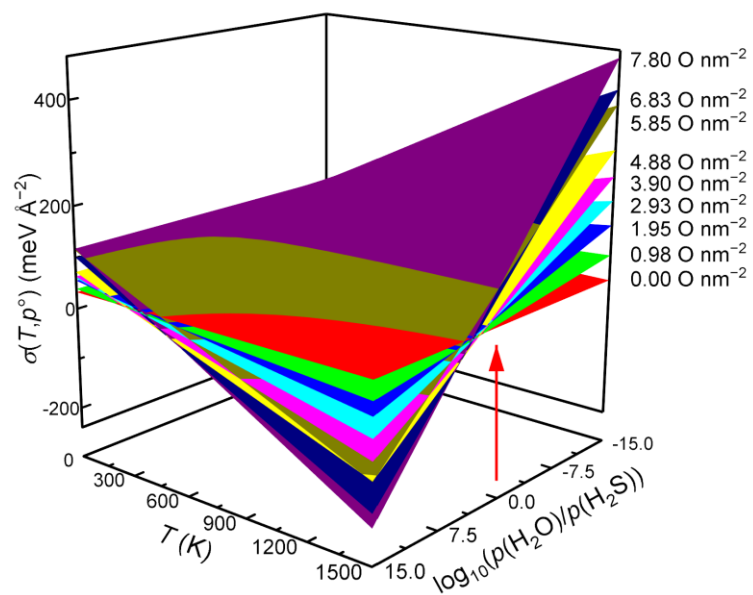

**Figure S12.** Bird's eye view of the non-planar potential energy surface representations of the surface free energies for all the coverages of O, indicated in the figure, considered for termination  $\text{Fe}_A$  of the  $\text{Fe}_3\text{S}_4(001)$  surface. The red arrow indicates the direction for the bi-dimensional projection onto the plane formed by the temperature and ratio of partial pressures of  $\text{H}_2\text{O}$  and  $\text{H}_2\text{S}$ .

**Table S11.** Unscaled and scaled wavenumbers for the fundamental vibrational modes calculated for a single CO<sub>2</sub> molecule interacting with the different adsorption sites considered for the partially oxidised 62.5O-Fe<sub>3</sub>S<sub>4</sub>(001) surface. The presented vibrational modes are the asymmetric stretching ( $\nu_{\text{asym}}$ ), symmetric stretching ( $\nu_{\text{sym}}$ ) and average bending ( $\delta$ ) modes.

| Adsorption site                                                     |          | O              | S                                   | Fe <sub>A</sub>   | Fe <sub>B</sub>   |
|---------------------------------------------------------------------|----------|----------------|-------------------------------------|-------------------|-------------------|
| Structural type                                                     |          | $\mu_3-\eta^3$ | $\mu_2-\eta^2-(\text{C}, \text{O})$ | $\eta^1-\text{O}$ | $\eta^1-\text{O}$ |
| $\nu_{\text{asym}}(\text{O}=\text{C}=\text{O})$ (cm <sup>-1</sup> ) | Unscaled | 1574           | 1750                                | 2412              | 2353              |
|                                                                     | Scaled   | 1520           | 1690                                | 2329              | 2272              |
| $\nu_{\text{sym}}(\text{O}=\text{C}=\text{O})$ (cm <sup>-1</sup> )  | Unscaled | 1269           | 1126                                | 1343              | 1323              |
|                                                                     | Scaled   | 1225           | 1088                                | 1297              | 1278              |
| $\delta(\text{O}=\text{C}=\text{O})$ (cm <sup>-1</sup> )            | Unscaled | 823            | 695                                 | 602               | 615               |
|                                                                     | Scaled   | 795            | 671                                 | 581               | 594               |

**Table S12.** Unscaled and scaled wavenumbers for the fundamental vibrational modes calculated for a single H<sub>2</sub>O molecule interacting with the different adsorption sites considered for the partially oxidised 62.5O-Fe<sub>3</sub>S<sub>4</sub>(001) surface. The presented vibrational modes are the asymmetric stretching ( $\nu_{\text{asym}}$ ), symmetric stretching ( $\nu_{\text{sym}}$ ) and average bending ( $\delta$ ) modes.

| Adsorption site                                    |          | Fe <sub>A</sub> | Fe <sub>A</sub> , Fe <sub>A</sub> |                | Fe <sub>B</sub> |                |
|----------------------------------------------------|----------|-----------------|-----------------------------------|----------------|-----------------|----------------|
| Type                                               |          | Molecular       | Molecular                         | Dissociative   | Molecular       | Dissociative   |
| Structural type                                    |          | $\mu_3-\eta^3$  | $\mu_4-\eta^4$                    | $\mu_3-\eta^3$ | $\mu_3-\eta^3$  | $\mu_3-\eta^3$ |
| $\nu_{\text{asym}}(\text{H-O-H}) (\text{cm}^{-1})$ | Unscaled | 3602            | 3693                              | 3749           | 3654            | 3724           |
|                                                    | Scaled   | 3461            | 3549                              | 3602           | 3511            | 3578           |
| $\nu_{\text{sym}}(\text{H-O-H}) (\text{cm}^{-1})$  | Unscaled | 3177            | 2435                              | 3493           | 2084            | 2690           |
|                                                    | Scaled   | 3053            | 2339                              | 3356           | 2003            | 2585           |
| $\delta(\text{H-O-H}) (\text{cm}^{-1})$            | Unscaled | 1576            | 1527                              | 840            | 1576            | 940            |
|                                                    | Scaled   | 1514            | 1468                              | 807            | 1514            | 904            |

**Table S13.** Vibrational entropies calculated for the adsorbed species observed in the oxalate, carboxylate and bicarbonate pathways at 300 and 600 K. Adsorbed species are presented followed by the symbol \* and saddle points are represented by capital letters.

| Adsorption species                                    | $TS_{\text{vib}}$ (eV) |       |
|-------------------------------------------------------|------------------------|-------|
|                                                       | 300 K                  | 600 K |
| $2\text{CO}_2^* + \text{H}_2\text{O}^*$               | 0.133                  | 0.682 |
| $\text{C}_2\text{O}_4^* + \text{H}_2\text{O}^*$       | 0.167                  | 0.759 |
| $\text{HC}_2\text{O}_4^* + \text{OH}^*$               | 0.172                  | 0.770 |
| $\text{H}_2\text{C}_2\text{O}_4^* + \text{O}^*$       | 0.165                  | 0.747 |
| $\text{CO}_2\text{H}^* + \text{CO}_2^* + \text{OH}^*$ | 0.120                  | 0.652 |
| $2\text{CO}_2\text{H}^* + \text{O}^*$                 | 0.125                  | 0.654 |
| $\text{CO}_3\text{H}^* + \text{CO}_2^* + \text{H}^*$  | 0.131                  | 0.670 |
| $\text{CO}_3\text{H}^* + \text{CO}_2\text{H}^*$       | 0.132                  | 0.661 |
| <i>A</i>                                              | 0.153                  | 0.695 |
| <i>B</i>                                              | 0.170                  | 0.761 |
| <i>C</i>                                              | 0.168                  | 0.761 |
| <i>D</i>                                              | 0.125                  | 0.679 |
| <i>E</i>                                              | 0.123                  | 0.651 |
| <i>F</i>                                              | 0.144                  | 0.736 |
| <i>G</i>                                              | 0.131                  | 0.672 |
| <i>H</i>                                              | 0.131                  | 0.668 |
| <i>I</i>                                              | 0.158                  | 0.707 |

**Table SI4.** Entropy extracted from the thermodynamic tables for the isolated CO<sub>2</sub>, H<sub>2</sub>O, H<sub>2</sub>C<sub>2</sub>O<sub>4</sub> and O<sub>2</sub> molecules.

| Adsorption species                           | <i>TS</i> (eV) |       |
|----------------------------------------------|----------------|-------|
|                                              | 300 K          | 600 K |
| CO <sub>2</sub>                              | 0.667          | 1.518 |
| H <sub>2</sub> O                             | 0.588          | 1.326 |
| H <sub>2</sub> C <sub>2</sub> O <sub>4</sub> | 0.952          | 2.361 |
| O <sub>2</sub>                               | 0.639          | 1.409 |

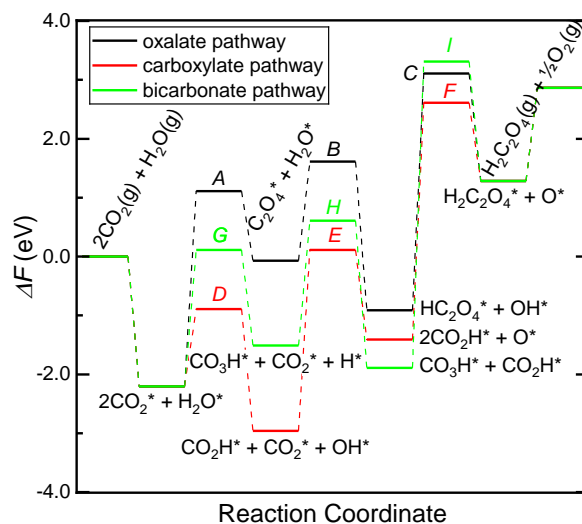

**Figure S13.** Minimum energy pathways (MEPs) for the conversion of  $\text{CO}_2$  and  $\text{H}_2\text{O}$  into  $\text{H}_2\text{C}_2\text{O}_4$  on the partially oxidised 62.5O- $\text{Fe}_3\text{S}_4(001)$  surface at 0 K. Minimum states are denoted by bold lines and saddle point are represented by narrow lines linked by dashed lines. Energies are referenced to the isolated  $2\text{CO}_2(\text{g}) + \text{H}_2\text{O}(\text{g})$  molecules, including the surface slab. Adsorbed species are presented followed by the symbol \*.



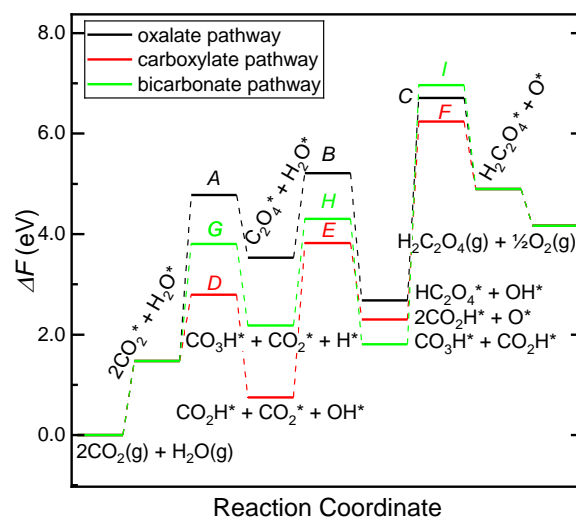

**Figure S14.** Minimum energy pathways (MEPs) for the conversion of  $\text{CO}_2$  and  $\text{H}_2\text{O}$  into  $\text{H}_2\text{C}_2\text{O}_4$  on the partially oxidised  $62.5\text{O-Fe}_3\text{S}_4(001)$  surface at 600 K. Minimum states are denoted by bold lines and saddle point are represented by narrow lines linked by dashed lines. Energies are referenced to the isolated  $2\text{CO}_2(\text{g}) + \text{H}_2\text{O}(\text{g})$  molecules, including the surface slab. Adsorbed species are presented followed by the symbol \*.
